# Supplementary material
Source: MDPI journal article supplement (https://www.mdpi.com/2075-163X/12/5/520)
Supplement: s1 [file s1]

# Supplementary Materials: Arsenopyrite Dissolution and Bi-Oscorodite Precipitation by *Acidithiobacillus ferrivorans* ACH under Mesophilic Condition

Sergio Barahona , Erick Herrera , Andrea Jara , Juan Castro-Severyn , Karem Gallardo , Gerardo Fuentes , Cristina Dorador , Claudia Saavedra and Francisco Remonsellez \*

**Table S1.** Sequence of arsenic proteins identified in *A. ferrivorans* ACH genome.

| Protein | Sequence                                                                                                                                                                                                                                                                                                                                                                                                                                                                                                                                                                                                                                      |
|---------|-----------------------------------------------------------------------------------------------------------------------------------------------------------------------------------------------------------------------------------------------------------------------------------------------------------------------------------------------------------------------------------------------------------------------------------------------------------------------------------------------------------------------------------------------------------------------------------------------------------------------------------------------|
| ArsA    | MLFLQTPPTFLFFTGGVGGKTSLSCATAIHLVRLGKKVLLVSTDPASNVGQVFSQAIGNKITAI<br>SAVPGLFALEIDPQQAAQEYRERIVGPVRGALPDVAVKGIEEQLSGACTTEIAAFDEFTALLTDA<br>TLTVDYDHIIFDTAPTGHITIRLLQLSGAWSGFIEKNPEGASCLGPLAGLEKQRQRYAEAVKALS<br>PARTRLILVARAQKTTLDEVARTHQELAAATGLTRQNLVINGVLPAAEEAVHDALAAAIQREQ<br>AAIASMPAALRDLVDQLPLKAFNMVGVGVEALCSLLSDQDESAPAGSAAPTERIELPQLLTVEA<br>IAGTGHGLIMMMGGKGVGKTTLAAAVAVALAERGLPVHLTSDPAAHLSDTLAGSLGNLEV<br>SRIDPELETERYRQHVLDTKGQDLDAEGRAMLEEDLRSPCTEIAVFQAFSRVIREAGKQFVVM<br>TAPTGHITLLLLDATGAYHREVTRHLVDPQVHYTTPMMQLQDPERTQVLIVTLPEPTPVLEAAQ<br>LQEDLRRAGIEPWA VINNSLAAAPTASPLLKQRAALEVAQIEAVRTRYAKRVALVPMQTEE<br>PVGIDHLRALLNPAS |
| ArsD    | MTKIRVFDPMCCSTGVCGPTIDPALVRFSADADWAKGQEIDLVRYNLSQEPMAFVNPNV<br>VKQFLDRSGAEALPLILVEGEIALAGRYPTREELVRWAGLAAAPVMESPSGGCCGGSGTC                                                                                                                                                                                                                                                                                                                                                                                                                                                                                                                   |
| ArsC    | MKTLNIFLCTGNSCRSLAEVTFNALAGPAMHAISAGSHPTGYVHPRALALLQREGFST<br>EGLYSKSWDDLKITPDIVITVCASAAGETCPAYLGPVIRAHWGVEDPAKATGSEAEIEAA<br>FASAYQILRRRIEAFALPWTRWEASGGVALQAEALARIGE                                                                                                                                                                                                                                                                                                                                                                                                                                                                        |
| ArsR    | MEIRQDHVIRLLEALASPVRLDIYRLLVEHEPDGLVAGDIAARLDIPGNGISFHLKTLQY<br>AGLVSGHREGRYQRYRACLKAAEELIAYLTDNCCGHRPELCAPCVTTDVNPSLSCAPSRT                                                                                                                                                                                                                                                                                                                                                                                                                                                                                                                  |
| ArsB    | MLAVLIFLATLILVIWQPKGLSIGWSAMGGAALALATGAITWNDIPAVWHIWDATFTFVALII<br>ISLILDEAGFFHW AALHV ARWGGGRGQLLFPLIVVLGAAIAAVFANDGAALLLTPIVMAILQ<br>LEFTAATFAFVIATGFVADTTSLPLMISNLVNIVSANYFNISFDRYALVMIPVDLVALAMTLLV<br>LWIAFRRLVPQHYGTAHLPEPATAIKDHLVFRTSFPVLILLIAYFVTAQWQVPVSVVTVTGAL<br>ILLALAGRWFQGGGGAQISVRKVLQDAPWKIVVFSLGMVLLVYGLRNAGLTDYVQAALLW<br>FGAHGRVAAALGTGFLAALLSSVMNNMPAVLVGALAIHHAPVAADPMIREIMVYANIIGCD<br>LGPKFTPIGSLATLLWLHVLGRKGVTTITWGQYMRIGLLITPPVLLVTLLALAWWLPLT                                                                                                                                                                    |
